# Supplementary material
Source: Springer Nature journal article supplement (https://www.springermedizin.de/resource/supplementary/13058_2012_3168_MOESM17_ESM.pdf/9703426)

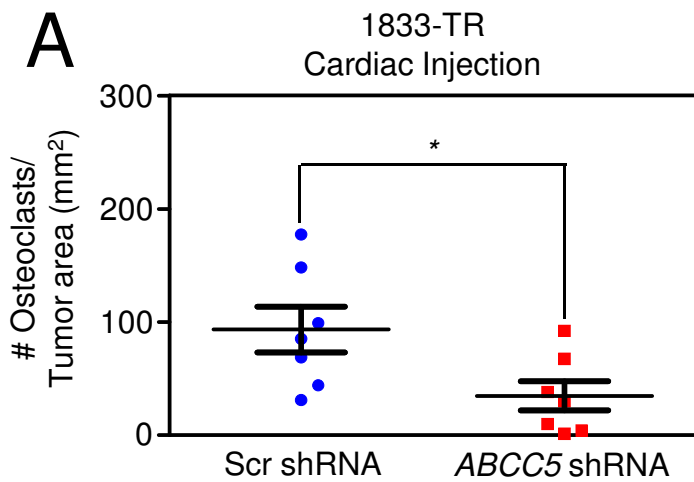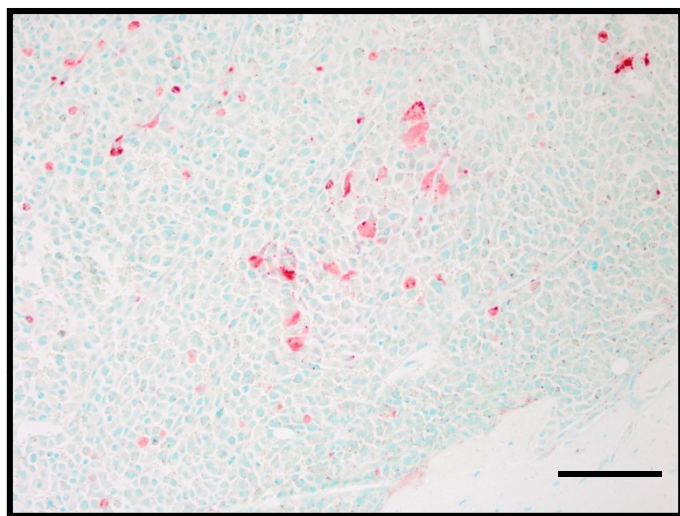

1833-TR Scr shRNA

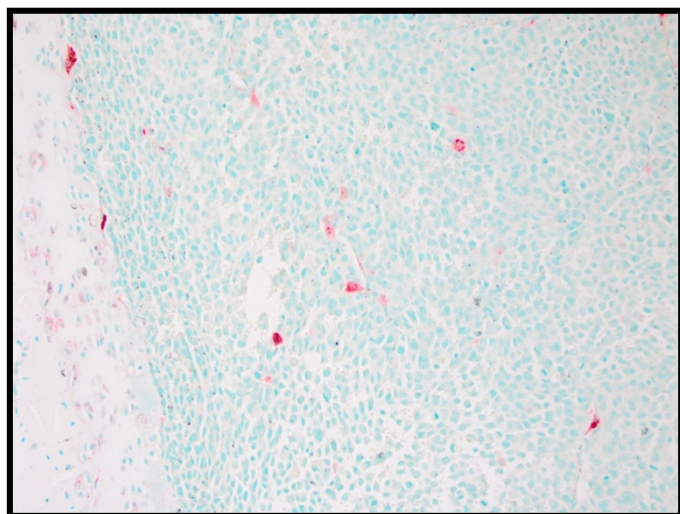

1833-TR *ABCC5* shRNA

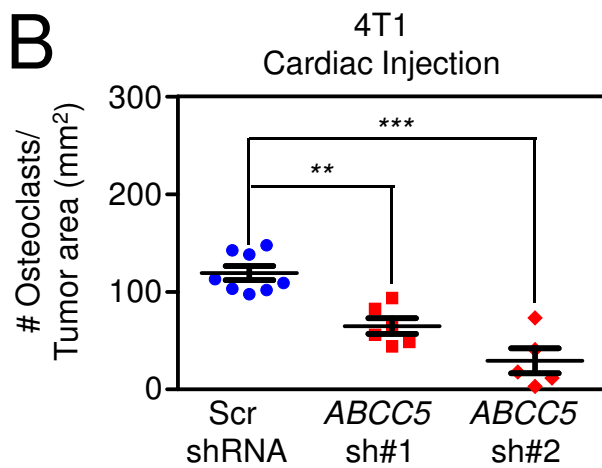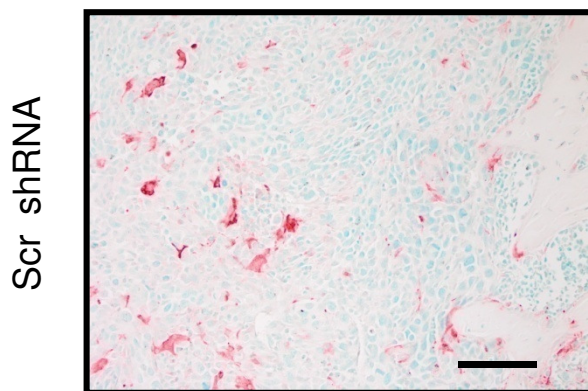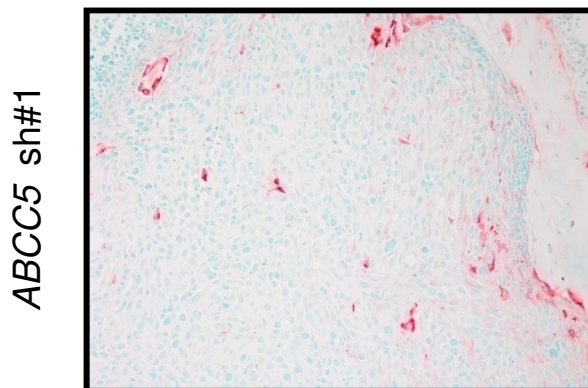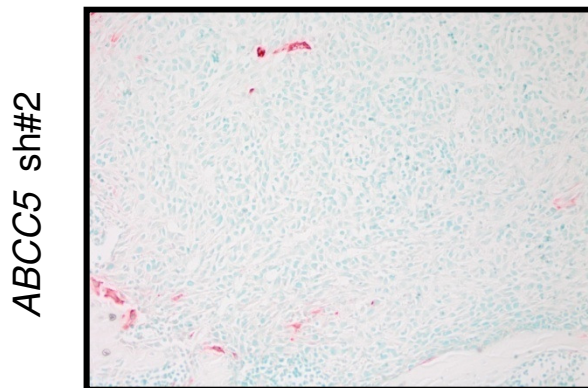

Supplement: MOESM17 [file 9703426]
